# Supplementary material for: PANX1-mediated ATP release confers FAM3A’s suppression effects on hepatic gluconeogenesis and lipogenesis
Source: PubMed Central journal article supplement (PMC11210080; doi:10.1186/s40779-024-00543-6), 2024-06-27
Supplement: 40779_2024_543_MOESM1_ESM.pdf [file 40779_2024_543_MOESM1_ESM.pdf]

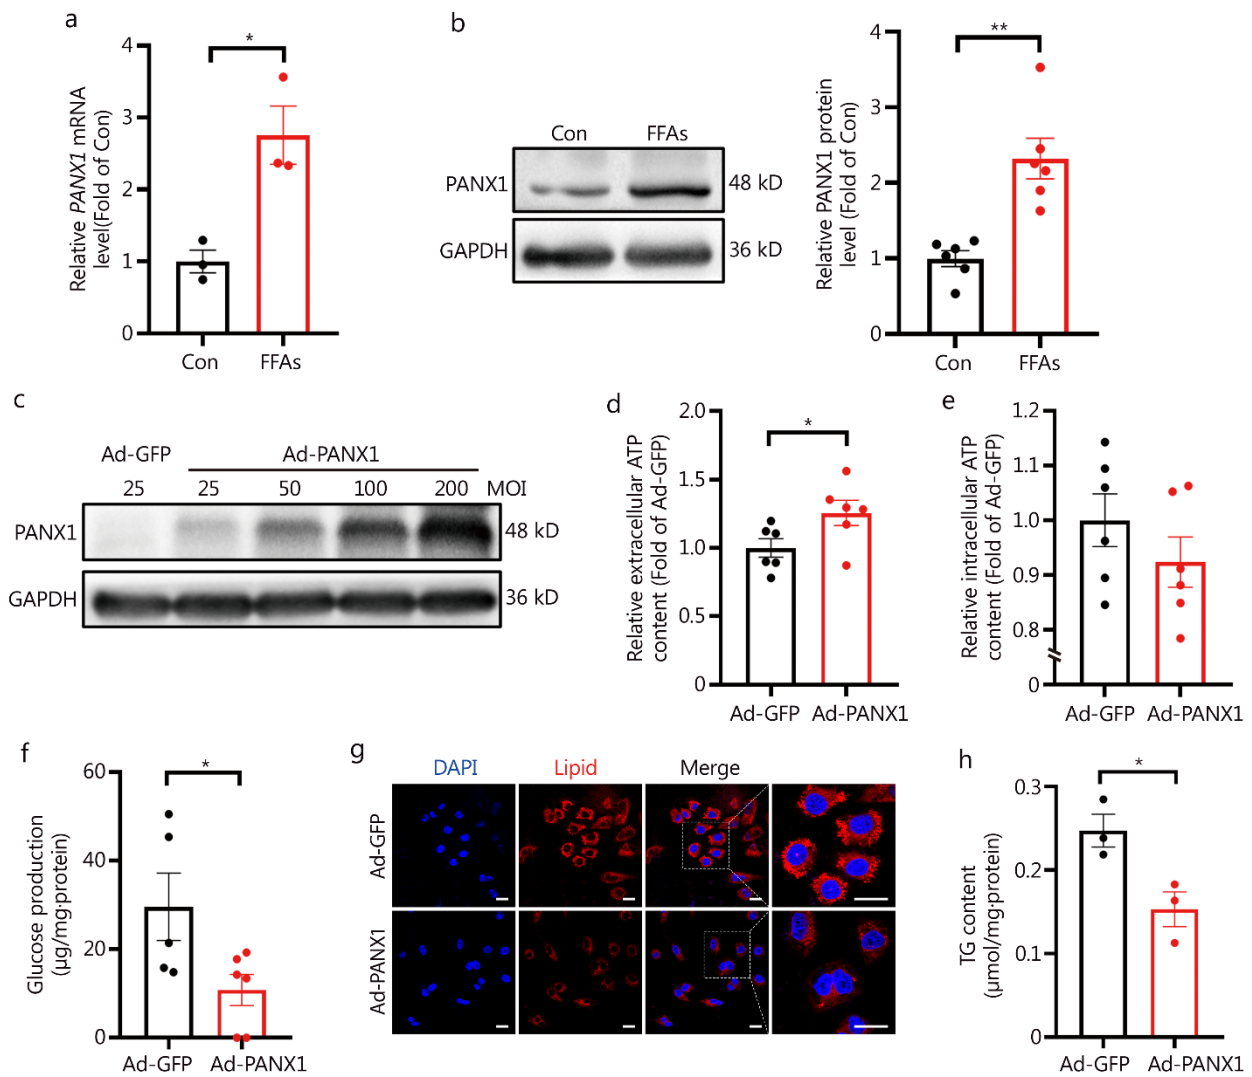

**Fig. S1** Overexpression of pannexin 1 (PANX1) inhibited glucose production and lipid accumulation in HepG2 cells. **a** Treatment with FFAs increased the *PANX1* mRNA level in HepG2 cells ( $n = 3$ ). **b** Treatment with FFAs increased PANX1 protein level in HepG2 cells. The left panel showed representative gel images of protein levels, and the right panel presented quantitative data ( $n = 6$ ). **c** Verification of the efficiency of PANX1-overexpressing adenovirus in HepG2 cells. The effects of PANX1 overexpression on extracellular (**d**) and intracellular (**e**) ATP content in HepG2 cells ( $n = 6$ ). **f** Overexpression of PANX1 inhibited glucose production in HepG2 cells,  $n = 5$  (Ad-GFP) and 6 (Ad-PANX1). **g** Representative confocal lipid staining images of Ad-GFP- or Ad-PANX1-infected HepG2 cells. Scale bar = 25  $\mu$ m. **h** PANX1 overexpression decreased TG content in FFAs-treated HepG2 cells ( $n = 3$ ). \* $P < 0.05$  or \*\* $P < 0.01$ . Ad-GFP Ad-GFP-infected HepG2 cells, Ad-PANX1 Ad-PANX1-infected HepG2 cells, MOI multiplicity of infection, Con control, ATP adenosine triphosphate, TG triglyceride

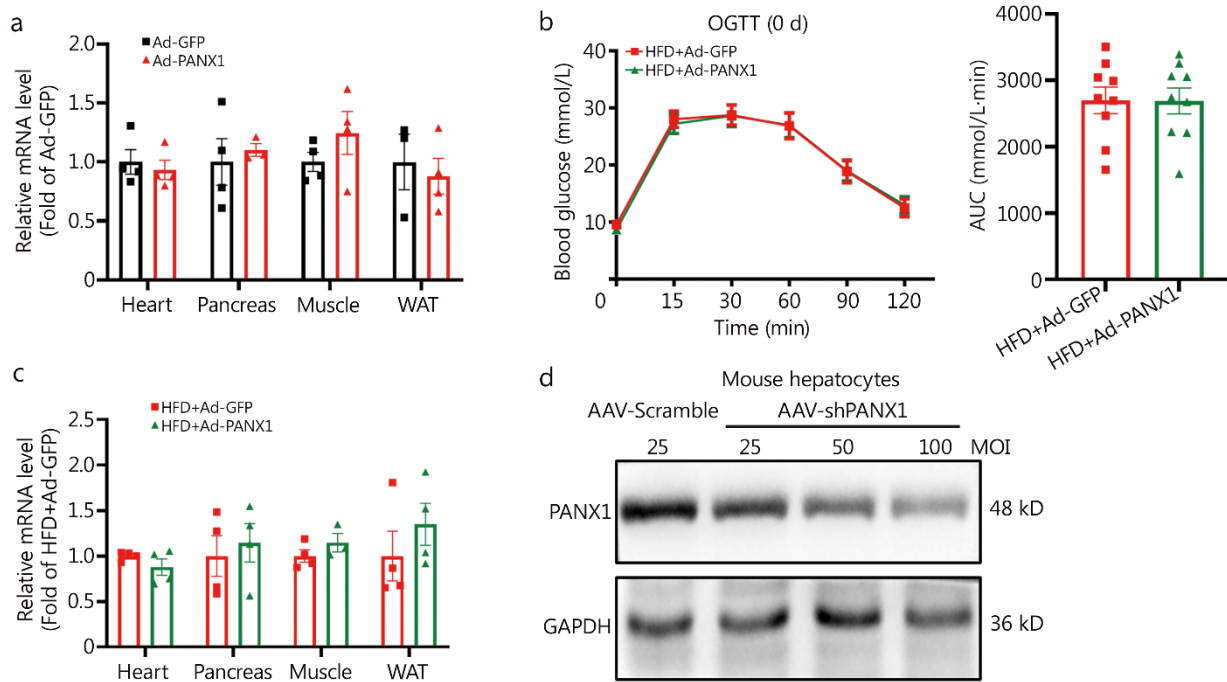

**Fig. S2** Verifying the efficiency of AAV-shPANX1 in mouse hepatocytes. **a** Relative pannexin 1 (*PANX1*) mRNA levels in main metabolic tissues *db/db* mice injected with Ad-PANX1 or Ad-GFP, from left to right,  $n = 4, 4, 4, 3, 4, 4, 3$  and  $4$ , respectively. **b** Oral glucose tolerance test (OGTT) had no significant difference between two sets of mice before adenoviral injection in high-fat diet (HFD)-fed mice. The left panel showed OGTT curves and the right panel presented the area under the curve (AUC) data ( $n = 9$ ). **c** Relative *PANX1* mRNA levels in main metabolic tissues of HFD injected with Ad-PANX1 or Ad-GFP,  $n = 4$  (HFD + Ad-GFP), from left to right,  $n = 4, 4, 3$  and  $4$  (HFD + Ad-PANX1), respectively. **d** Verification of the efficiency of AAV-shPANX1 in mouse hepatocytes. WAT white adipose tissues, Ad-GFP Ad-GFP-infected HepG2 cells, Ad-PANX1 Ad-PANX1-infected HepG2 cells, AAV-Scramble AAV-Scramble-infected mouse hepatocytes, AAV-shPANX1 AAV-shPANX1-infected mouse hepatocytes

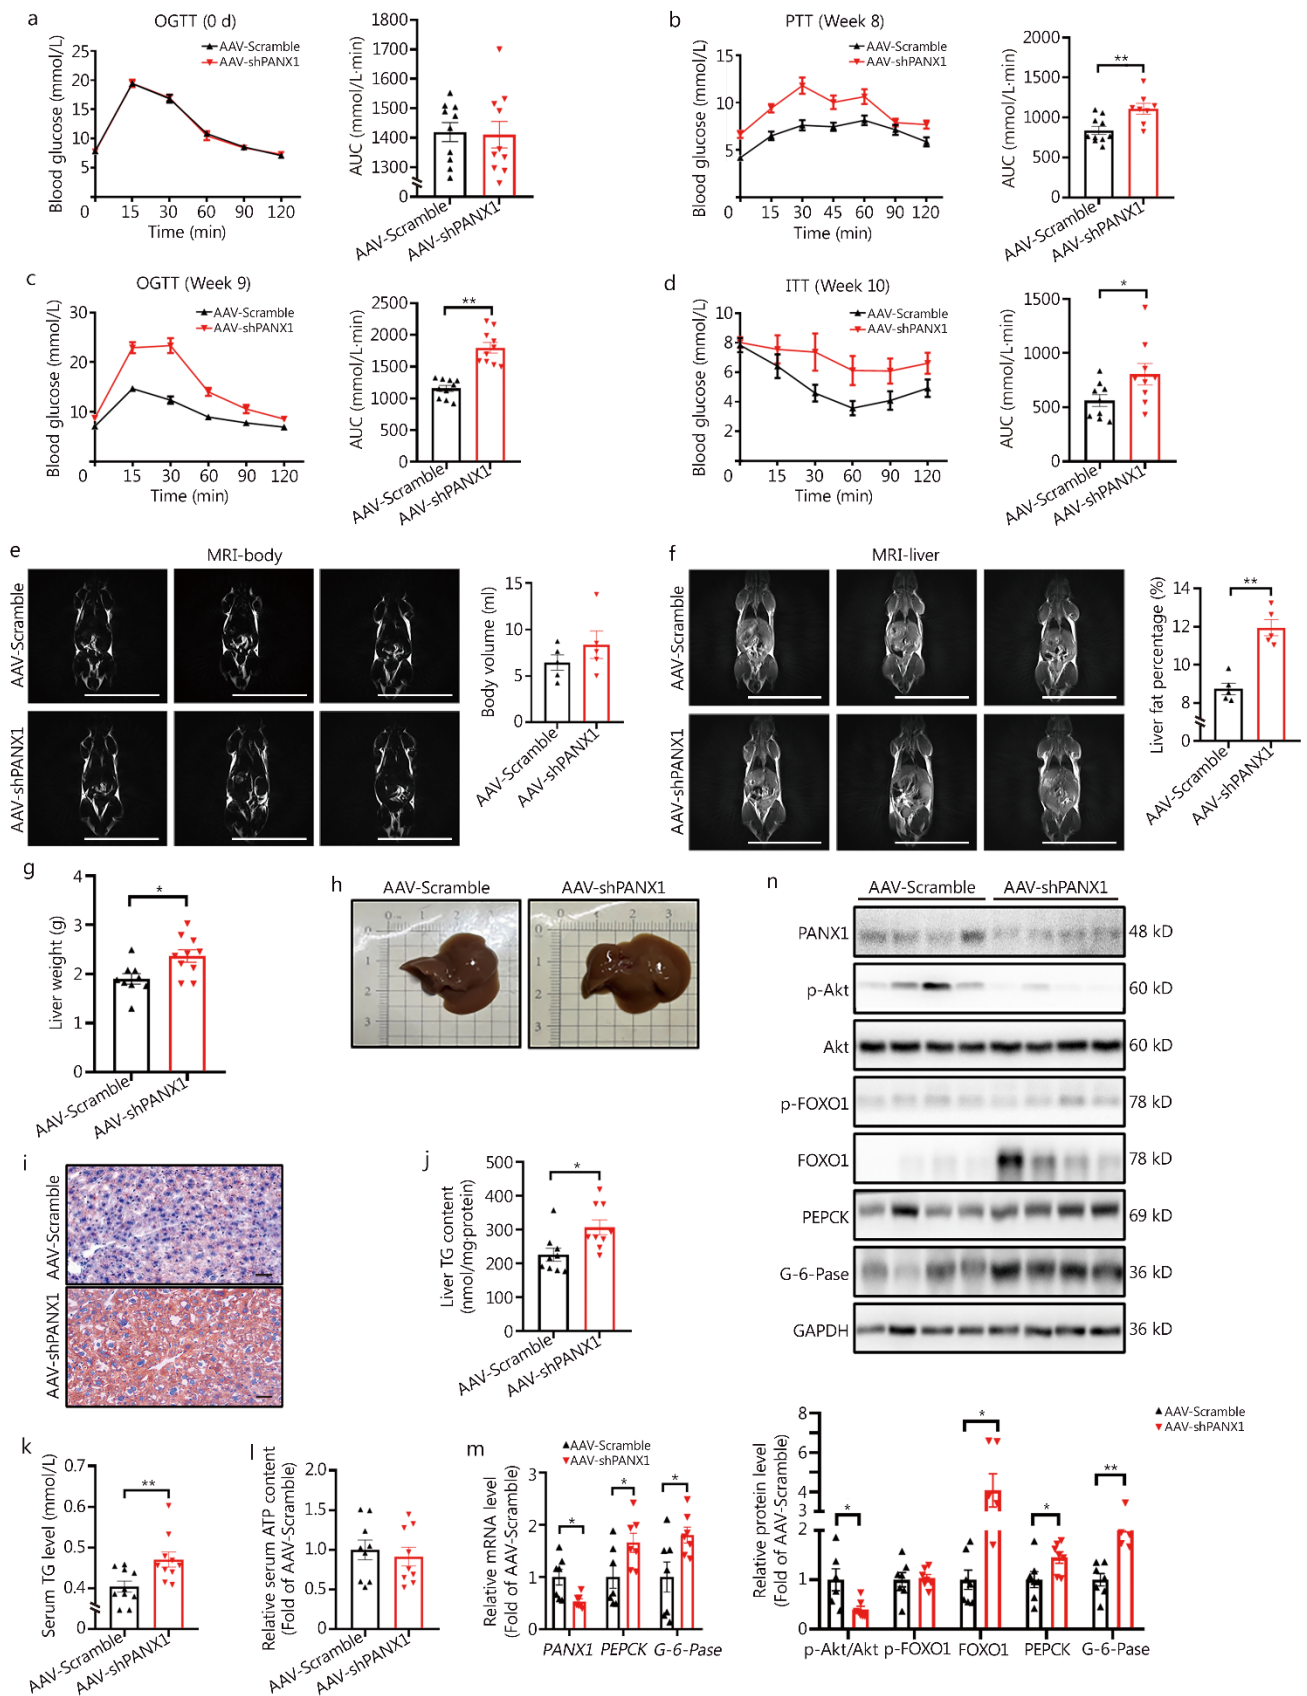

**Fig. S3** Hepatic PANX1 inhibition aggravated HFD-induced dysregulated glucolipid metabolism in HFD-fed mice.

**a** Oral glucose tolerance test (OGTT) showed no difference between the two sets of mice prior to adeno-associated viral (AAV) injection in high-fat diet (HFD)-fed mice ( $n = 10$ ). The left panel showed OGTT curves and the right

panel presented the area under the curve (AUC) data. Mice were transduced with AAV-GFP or AAV-shPANX1 and then subjected to HFD feeding. **b** The left panel showed pyruvate tolerance test (PTT) curves on week 8 post-AAV injection in HFD-fed mice, and the right panel presented AUC data,  $n = 10$  (AAV-Scramble) and 8 (AAV-shPANX1). **c** The left panel showed OGTT curves on week 9 post-AAV injection in HFD-fed mice, and the right panel presented AUC data ( $n = 10$ ). **d** The left panel showed insulin tolerance test (ITT) curves on week 10 post-AAV injection in HFD-fed mice, and the right panel displayed AUC data ( $n = 9$ ). **e** The left panel presented representative magnetic resonance imaging (MRI) images of whole-body fat of HFD-fed mice injected with AAV-Scramble or AAV-shPANX1 at 11 weeks, and the right panel displayed quantitative data. Scale bar = 5 cm ( $n = 5$ ). **f** The left panel presented representative MRI images of liver fat of HFD-fed mice injected with AAV-Scramble or AAV-shPANX1 at 11 weeks, and the right panel showed quantitative data ( $n = 5$ ). Scale bar = 5 cm. Liver weight (**g**, from left to right,  $n = 9$  and 10) of mice on week 13 (sacrifice) post-viral-injection. Morphological observation (**h**) and oil red O staining analyses (**i**) of AAV-Scramble- or AAV-shPANX1-injected mouse livers ( $n = 5$ ). Scale bar = 50  $\mu\text{m}$ . Hepatic (**j**,  $n = 9$ ) and serum (**k**,  $n = 10$ ) triglyceride (TG) levels of AAV-Scramble- or AAV-shPANX1-injected mice. **l** Serum adenosine triphosphate (ATP) content in the two groups of mice ( $n = 9$ ). **m** Relative mRNA levels of gluconeogenic genes in the two sets of mouse livers ( $n = 7$ ). **n** The upper panel showed representative gel images of gluconeogenic proteins in mouse livers, and the lower panel displayed quantitative data, from left to right,  $n = 6, 7, 7, 7, 7, 6, 7, 7, 7$  and 7, respectively.  $*P < 0.05$  or  $**P < 0.01$ . AAV-Scramble AAV-Scramble-injected HFD-fed mice, AAV-shPANX1 AAV-shPANX1-injected HFD-fed mice, Akt protein kinase B, FOXO1 forkhead box protein O1, PEPCK phosphoenolpyruvate carboxykinase, G-6-Pase glucose-6-phosphatase

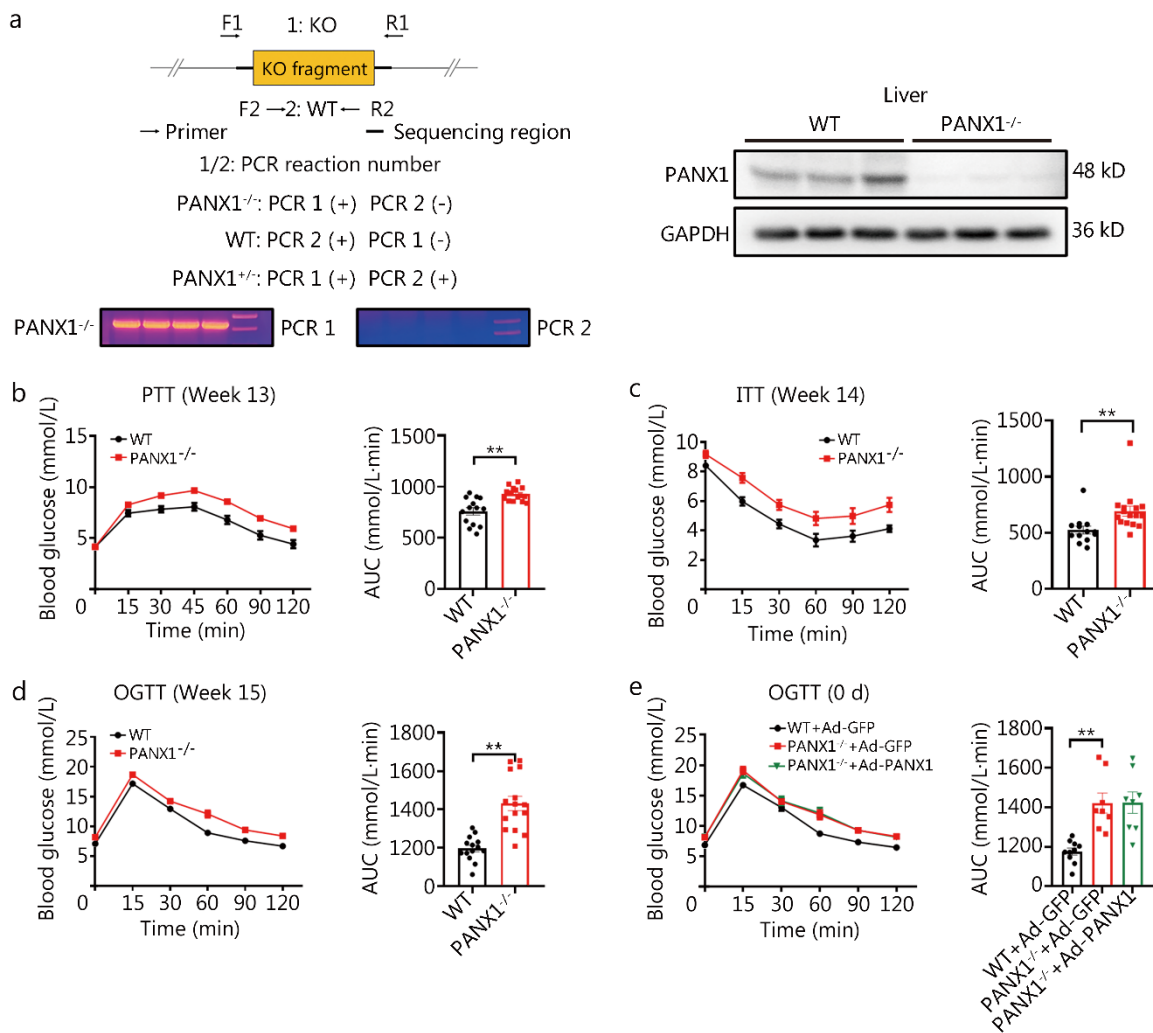

**Fig. S4** PANX1-deficient mice exhibited impaired glucose tolerance fed on a normal diet. **a** The generation ( $n = 4$ ) and characterization ( $n = 3$ ) of Pannexin 1 (*PANX1*) knockout mice. **b** The left panel displayed pyruvate tolerance test (PTT) curves of wild type (WT) and PANX1-deficient mice at 13-week old, and the right panel showed area under the curve (AUC) data,  $n = 14$  (WT) and 15 (PANX1<sup>-/-</sup>). **c** The left panel displayed insulin tolerance test (ITT) curves of WT and PANX1-deficient mice at 14-week old, and the right panel presented AUC data  $n = 13$  (WT) and 16 (PANX1<sup>-/-</sup>). **d** The left panel presented oral glucose tolerance test (OGTT) curves of WT and PANX1-deficient mice at 15-week old, and the right panel showed AUC data,  $n = 14$  (WT) and 15 (PANX1<sup>-/-</sup>). **e** The left panel displayed OGTT curves of WT and PANX1-deficient mice at 16-week old before adenoviral injection (Day 0), and the right panel showed AUC data,  $n = 10$  (WT + Ad-GFP), 8 (PANX1<sup>-/-</sup> + Ad-GFP) and 8 (PANX1<sup>-/-</sup> + Ad-PANX1). \*\* $P < 0.01$ . KO knock out, PCR polymerase chain reaction, WT wild-type, PANX<sup>-/-</sup> PANX1-deficient mice, WT + Ad-GFP Ad-GFP-injected wild type mice, PANX<sup>-/-</sup> + Ad-GFP Ad-GFP-injected PANX1-deficient mice, PANX<sup>-/-</sup> + Ad-PANX1 Ad-PANX1-injected PANX1-deficient mice

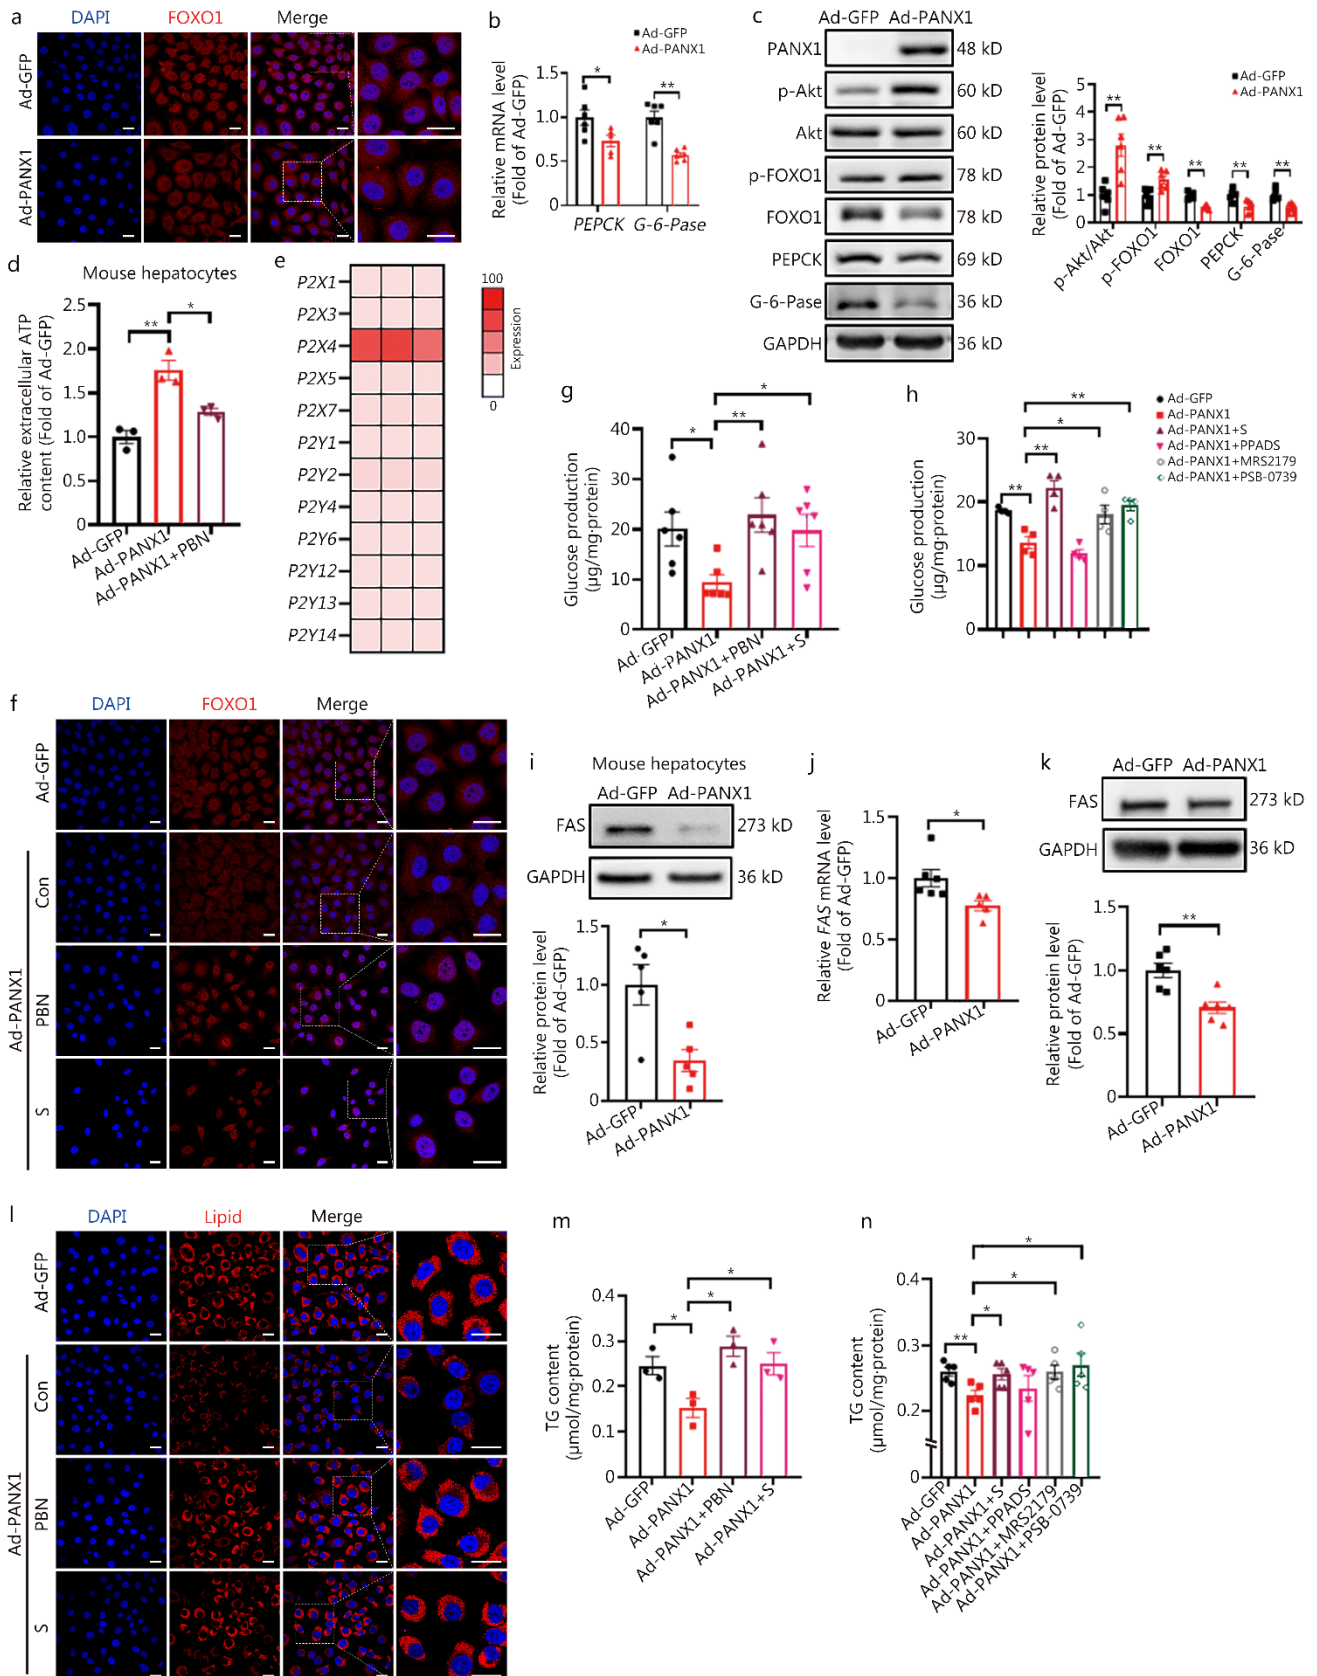

**Fig. S5** Treatment with PBN or suramin blunted PANX1-mediated regulatory effects on glucolipid metabolism in HepG2 cells. **a** Representative immunofluorescent staining images of forkhead box protein O1 (FOXO1) in Ad-GFP- or Ad-PANX1-infected HepG2 cells ( $n = 3$ ). Scale bar = 25  $\mu\text{m}$ . **b** Relative mRNA levels of gluconeogenic genes in

Ad-GFP- or Ad-PANX1-infected HepG2 cells, from left to right,  $n = 6, 5, 6,$  and  $6,$  respectively. **c** The left panel showed representative gel images of gluconeogenic proteins in Ad-GFP- or Ad-PANX1-infected HepG2 cells, and the right panel displayed quantitative data ( $n = 6$ ). **d** PBN treatment reversed PANX1-induced increase in extracellular adenosine triphosphate (ATP) content in mouse hepatocytes ( $n = 3$ ). **e** Determining the level profile of P2 receptors using RNA-sequencing in primary hepatocytes. The panel showed the heat map based on transcripts per million (TPM) ( $n = 3$ ). Treatment with PANX1 inhibitor PBN or P2 receptor inhibitor suramin blunted PANX1-induced FOXO1 nuclear exclusion of FOXO1 (**f**,  $n = 3$ ) and inhibition of glucose production (**g**,  $n = 6$ ) in HepG2 cells. Scale bar =  $25 \mu\text{m}$ . **h** The effect of PANX1 inhibitor PBN, pan P2 receptor inhibitor suramin, pan P2X inhibitor PPADS, specific P2Y1 inhibitor MRS2179 or specific P2Y12 inhibitor PSB-0739 on the glucose production in mouse hepatocytes ( $n = 4$ ). **i** PANX1 overexpression inhibited FAS protein level in mouse hepatocytes. The upper panel presented representative gel images, and the lower panel showed quantitative data ( $n = 5$ ). **j** PANX1 overexpression inhibited *FAS* mRNA level in HepG2 cells,  $n = 6$  (Ad-GFP) and  $5$  (Ad-PANX1). **k** PANX1 overexpression decreased FAS protein level in HepG2 cells. The upper panel displayed representative gel images, and the lower panel presented quantitative data ( $n = 6$ ). Treatment with PBN or suramin reversed PANX1-induced decrease in lipid accumulation (**l**) and triglyceride (TG) levels (**m**) in mouse hepatocytes ( $n = 3$ ). Scale bar =  $25 \mu\text{m}$ . **n** The effect of PANX1 inhibitor PBN, pan P2 receptor inhibitor suramin, pan P2X inhibitor PPADS, specific P2Y1 inhibitor MRS2179 or specific P2Y12 inhibitor PSB-0739 on lipid deposition in mouse hepatocytes ( $n = 5$ ). \* $P < 0.05$  or \*\* $P < 0.01$ . Con control, Ad-GFP Ad-GFP-infected HepG2 cells, Ad-PANX1 Ad-PANX1-infected HepG2 cells, Akt protein kinase B, FOXO1 forkhead box protein O1, PEPCK phosphoenolpyruvate carboxykinase, G-6-Pase glucose-6-phosphatase, PBN pannexin 1 (PANX1) inhibitor probenecid, S suramin

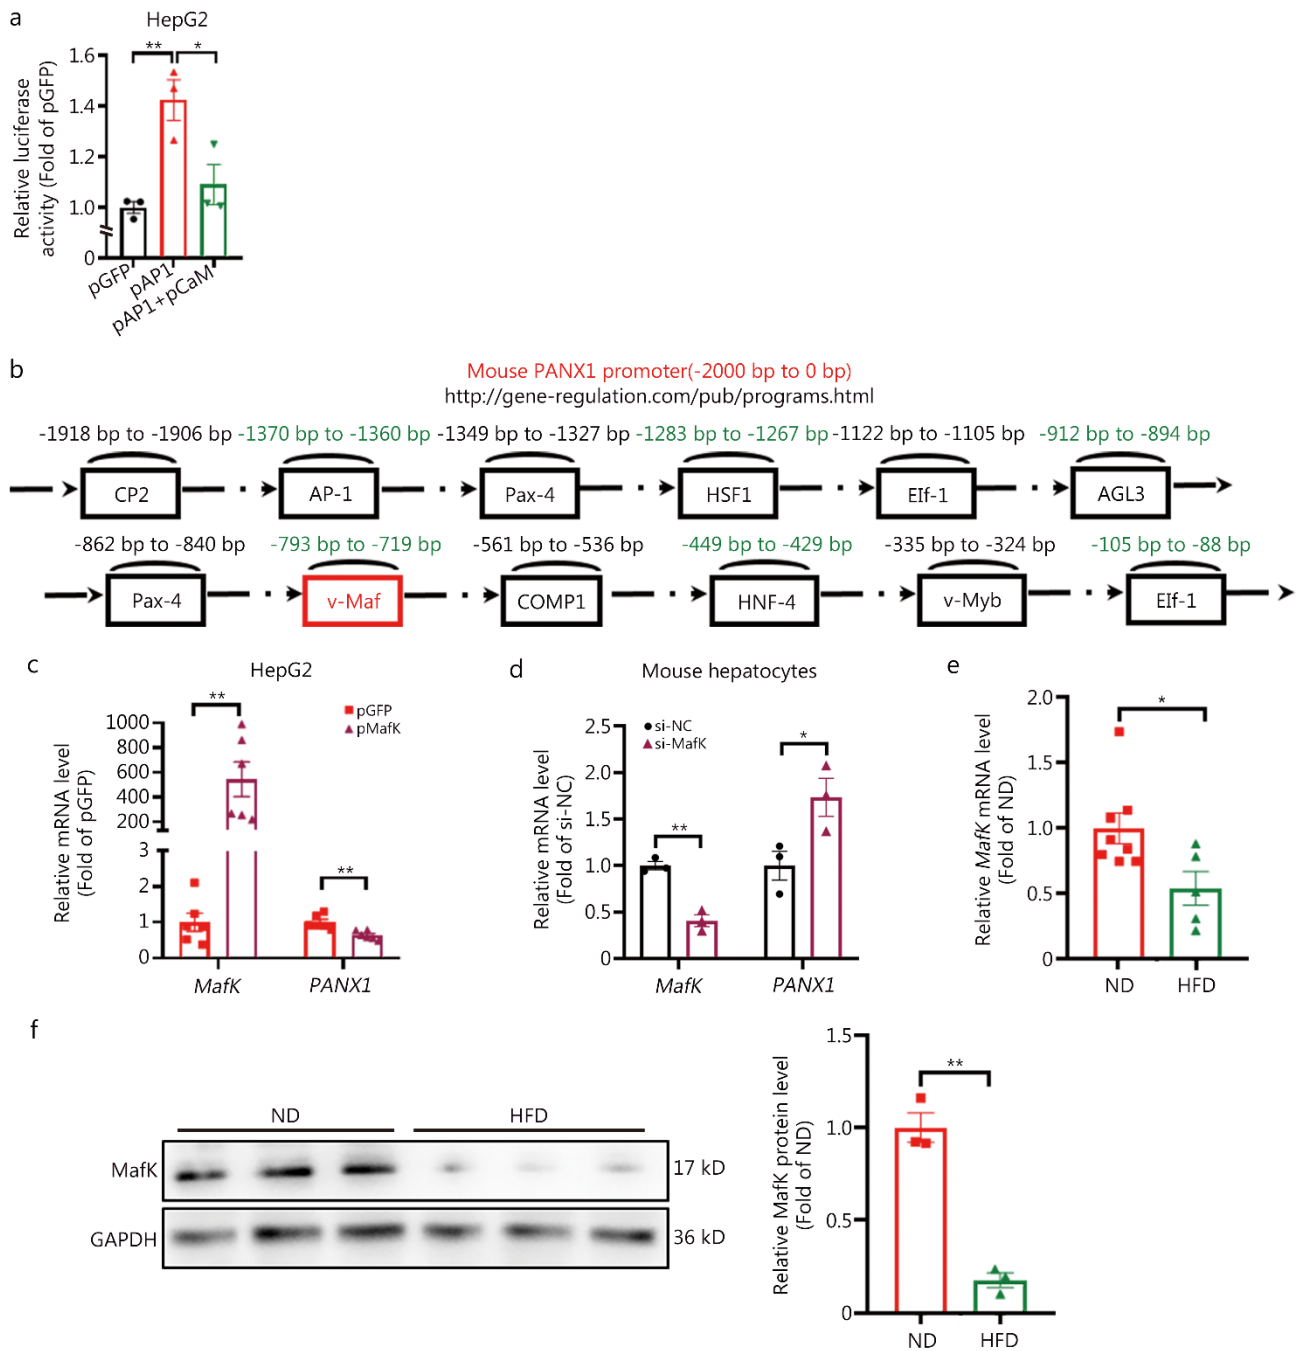

**Fig. S6** Free fatty acids upregulated PAXN1 expression by inhibiting MafK in HepG2 cells. **a** Calmodulin (CaM) overexpression reversed activator protein-1 (AP1)-promoted activation of the fatty acid synthase (*FAS*) gene promoter in HepG2 cells ( $n = 3$ ). **b** The potential binding sites for the transcription factors in mouse pannexin 1 (*PANX1*) gene promoters were analyzed in <http://www.gene-regulation.com/pub/databases.html/>. The potential binding sites are highly specific for certain transcription factors with high prediction scores presented. **c** Plasmid-mediated v-maf musculoaponeurotic fibrosarcoma oncogene homolog K (MafK) overexpression inhibited the mRNA level of *PANX1* in HepG2 cells ( $n = 6$ ). **d** siRNA silencing of *MafK* enhanced *PANX1* mRNA level in mouse hepatocytes ( $n = 3$ ). **e** The *MafK* mRNA level was decreased in high-fat diet (HFD) mouse livers,  $n = 8$  (ND) and 5 (HFD). **f** The MafK protein level was reduced in HFD mouse livers. The left panel showed representative gel images and the right panel



displayed quantitative data ( $n = 3$ ).  $*P < 0.05$ ,  $**P < 0.01$ . CP2 alpha-globin transcription factor CP2, Pax-4 paired box 4, HSF1 heat shock factor 1, Elf-1 ETS-related transcription factor Elf-1, AGL3 agamous-like MADS-box protein AGL3, v-Maf v-maf avian musculoaponeurotic fibrosarcoma oncogene homolog, COMP1 cooperates with myogenic proteins 1, HNF-4 hepatocyte nuclear factor-4, v-Myb v-myb avian myeloblastosis viral oncogene homolog

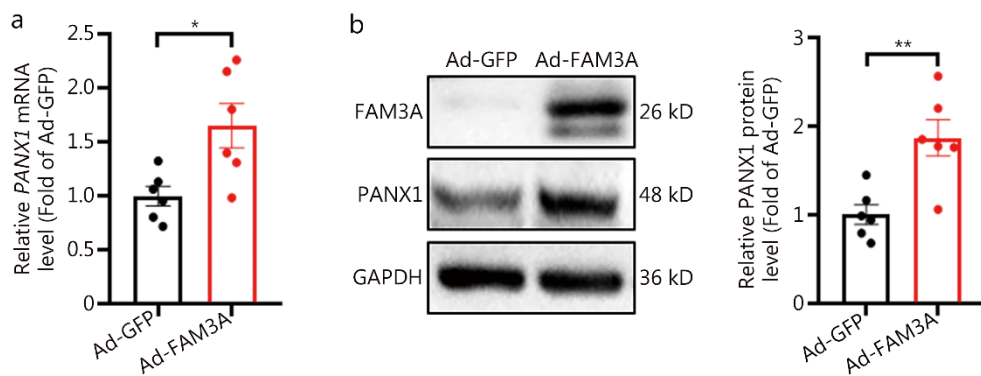

**Fig. S7** FAM3A overexpression induced PANX1 expression in HepG2 cells. **a** Family with sequence similarity 3 member A (FAM3A) overexpression increased pannexin 1 (*PANX1*) mRNA level in HepG2 cells. **b** Overexpression of FAM3A upregulated PANX1 protein level in HepG2 cells. The left panel showed representative gel images and the right panel presented quantitative data.  $n = 6$  for the corresponding experiments.  $*P < 0.05$ ,  $**P < 0.01$ . Ad-GFP Ad-GFP-infected HepG2 cells, Ad-FAM3A Ad-FAM3A-infected HepG2 cells

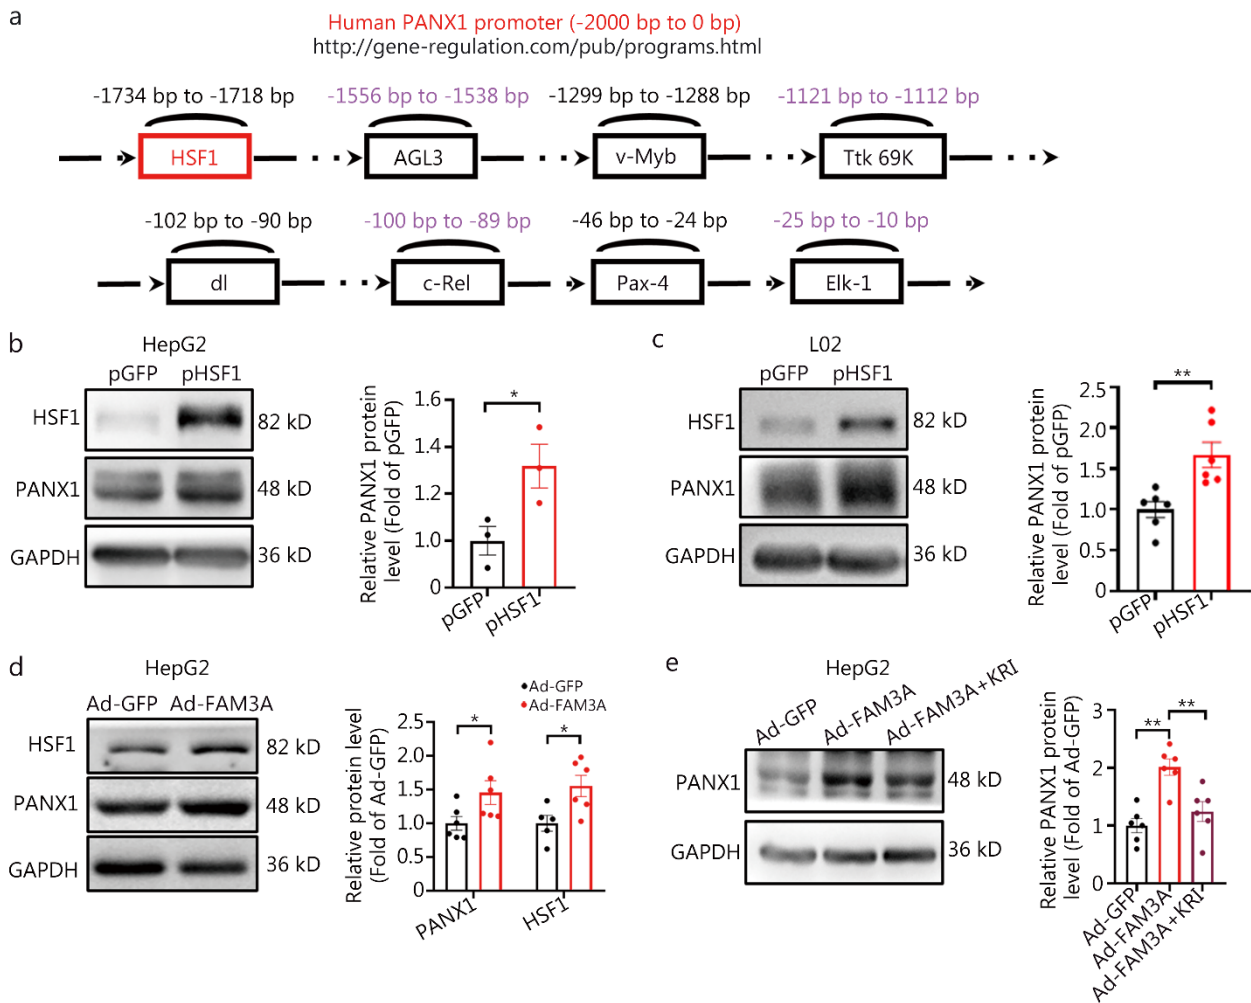

**Fig. S8** HSF1 activated the expression of PANX1 in HepG2 cells. **a** The binding sites for transcription factors in human pannexin 1 (*PANX1*) gene promoters were analyzed at <http://www.gene-regulation.com/pub/databases.html/>. The potential binding sites are highly specific for certain transcription factors with high prediction scores presented. Plasmid overexpression of heat shock factor 1 (HSF1) increased PANX1 protein levels in HepG2 (**b**,  $n = 3$ ) and L02 (**c**,  $n = 6$ ) cells. The left panel showed representative gel images and the right panel presented quantitative data. **d** FAM3A overexpression enhanced HSF1 and PANX1 protein levels in HepG2 cells. The left panel presented representative gel images, and the right panel displayed quantitative data, from left to right,  $n = 6, 6, 5,$  and  $6,$  respectively. **e** Treatment with HSF1 inhibitor blocked FAM3A-triggered PANX1 protein level in HepG2 cells ( $n = 6$ ). The left panel presented representative gel images, and the right panel displayed quantitative data. \* $P < 0.05,$  \*\* $P < 0.01.$  AGL3 agamous-like MADS-box protein AGL3, v-Myb v-myb avian myeloblastosis viral oncogene homolog, Ttk 69K tramtrack 69K, dl embryonic polarity protein dorsal, c-Rel proto-oncogene c-Rel, Pax-4 paired box 4, Elk-1 ETS domain-containing protein Elk-1, KRI KRIBB11

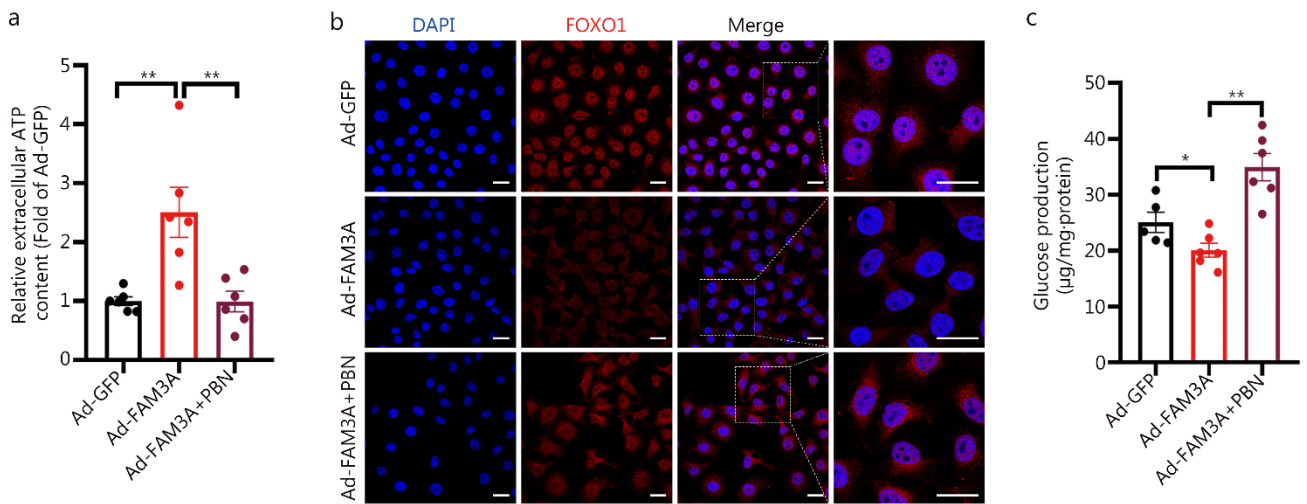

**Fig. S9** PBN treatment blocked FAM3A-promoted ATP release in HepG2 cells. **a** PBN treatment inhibited FAM3A-promoted ATP release in HepG2 cells ( $n = 6$ ). PBN treatment blocked FAM3A-induced forkhead box protein O1 (FOXO1) nuclear exclusion (**b**,  $n = 3$ ) and inhibition of glucose production (**c**, from left to right,  $n = 5, 6$ , and  $6$ ) in HepG2 cells. Scale bar =  $25 \mu\text{m}$ .  $*P < 0.05$ ,  $**P < 0.01$ . PBN pannexin 1 (PANX1) inhibitor probenecid, ATP adenosine triphosphate, Ad-GFP Ad-GFP-infected HepG2 cells, Ad-FAM3A Ad-FAM3A-infected HepG2 cells

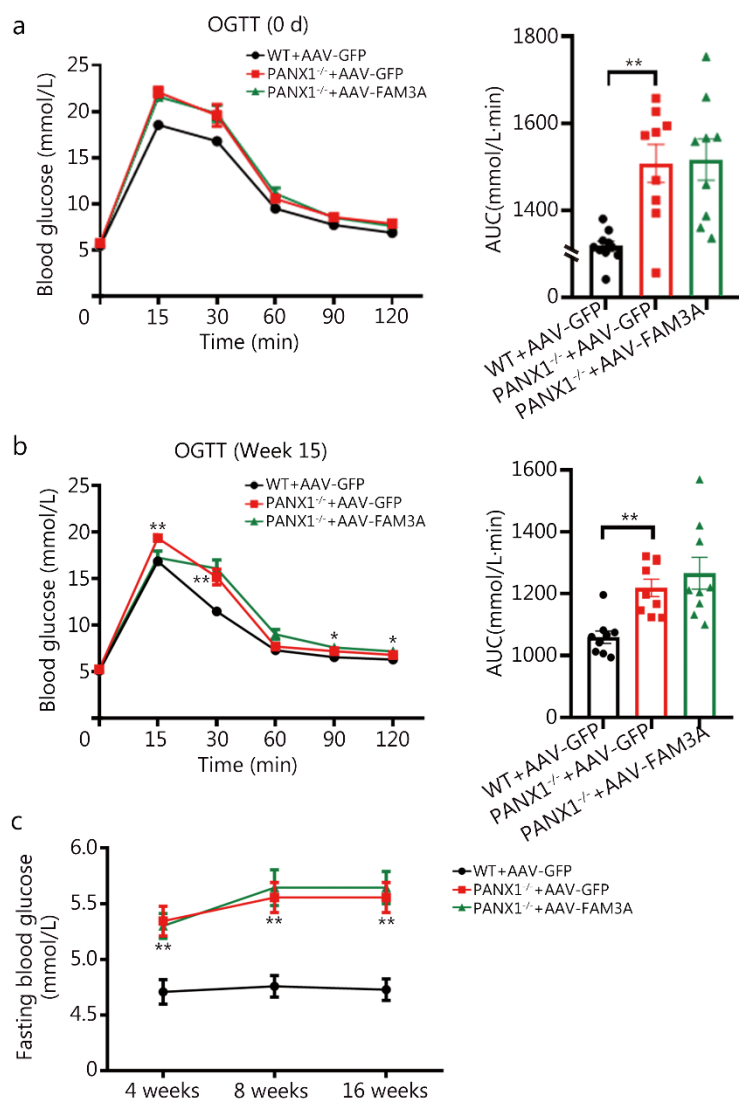

**Fig. S10** Liver FAM3A overexpression failed to improve the impaired glucose tolerance in PANX1-deficient mice. **a** Oral glucose tolerance test (OGTT) exhibited no difference between the two sets of PANX1-deficient mice prior to AAV injection. The left panel displayed OGTT curves, while the right panel presented AUC data,  $n = 10$  (WT + AAV-GFP), 9 (PANX1<sup>-/-</sup> + AAV-GFP) and 9 (PANX1<sup>-/-</sup> + AAV-FAM3A). **b** The left panel showed OGTT curves on week 15 post-AAV injection in PANX1-deficient mice, and the right panel displayed area under the curve (AUC) data ( $n = 9$ ). **c** Fasting blood glucose on week 4, 8 and 16 post AAV injection in PANX1-deficient mice,  $n = 10$  (WT + AAV-GFP), 9 (PANX1<sup>-/-</sup> + AAV-GFP) and 9 (PANX1<sup>-/-</sup> + AAV-FAM3A). In panels b and c, the \* and \*\* indicate the comparison between WT + AAV-GFP and PANX1<sup>-/-</sup> + AAV-GFP. \* $P < 0.05$ , \*\* $P < 0.01$ . WT wild-type, PANX1<sup>-/-</sup> PANX1-deficient mice, FAM3A family with sequence similarity 3 member A, PANX1<sup>-/-</sup> + AAV-GFP AAV-GFP-injected PANX1-deficient mice, PANX1<sup>-/-</sup> + AAV-FAM3A AAV-FAM3A-injected PANX1-deficient mice

**Table S1** Clinical parameters of individuals with or without non-alcoholic fatty liver disease (NAFLD)

| <b>Group</b> | <b>Age (year)</b> | <b>Gender</b> | <b>Height (cm)</b> | <b>Weight (kg)</b> | <b>ALT (U/L)</b> | <b>AST (U/L)</b> | <b>Albumin (g/L)</b> | <b>Total cholesterol (mmol/L)</b> | <b>Triglyceride (mmol/L)</b> | <b>HDL-C (mmol/L)</b> | <b>LDL-C (mmol/L)</b> | <b>Degree of steatosis</b> |
|--------------|-------------------|---------------|--------------------|--------------------|------------------|------------------|----------------------|-----------------------------------|------------------------------|-----------------------|-----------------------|----------------------------|
| Control      | 65                | Female        | 155                | 62                 | 11               | 23               | 45.5                 | 5.16                              | 0.70                         | 2.10                  | 2.72                  | FO                         |
|              | 58                | Female        | 155                | 80                 | 21               | 21               | 43.6                 | 3.68                              | 1.19                         | 1.36                  | 1.75                  | FO                         |
|              | 72                | Male          | 179                | 80                 | 15               | 18               | 41.6                 | 5.54                              | 1.44                         | 1.36                  | 3.31                  | FO                         |
| NAFLD        | 57                | Female        | 160                | 72                 | 65               | 60               | 39.1                 | 5.33                              | 1.41                         | 1.12                  | 3.25                  | F1-F2                      |
|              | 60                | Male          | 181                | 90                 | 16               | 19               | 43.8                 | 4.7                               | 0.93                         | 1.15                  | 2.78                  | F1-F2                      |
|              | 54                | Female        | 159                | 54                 | 11               | 21               | 43.8                 | 6                                 | 2.28                         | 1.07                  | 4.11                  | F1-F2                      |

*ALT* alanine aminotransferase, *AST* aspartate aminotransferase, *HDL-C* high-density lipoprotein cholesterol, *LDL-C* low-density lipoprotein cholesterol

**Table S2** siRNA sequence against mouse *MafK* mRNAs

| <b>Name</b>            | <b>Sense/ antisense</b> | <b>Sequences</b>                    |
|------------------------|-------------------------|-------------------------------------|
| si-MafK (Mus musculus) | Sense 1                 | 5'-UCUUAGCGAUGAUGAGCUGGU(dT)(dT)-3' |
|                        | Anti-sense 1            | 5'-ACCAGCUCAUCAUCGCUAAGA(dT)(dT)-3' |
|                        | Sense 2                 | 5'-CCACCACCAGUGUCAUCACCA(dT)(dT)-3' |
|                        | Anti-sense 2            | 5'-UGGUGAUGACACUGGUGGUGG(dT)(dT)-3' |
|                        | Sense 3                 | 5'-CGCUCCAAGUAUGAGGCCCUA(dT)(dT)-3' |
|                        | Anti-sense 3            | 5'-UAGGGCCUCAUACUUGGAGCG(dT)(dT)-3' |

**Table S3** List of oligonucleotide primer pairs used in Real-time PCR analysis

| <b>Gene</b>                        | <b>Forward primer (5'-3')</b> | <b>Reverse primer (5'-3')</b> |
|------------------------------------|-------------------------------|-------------------------------|
| <i>PANX1</i> (H)                   | CCTGAGAAACGACAGCACC           | TGTAGACAACCACGGGAGC           |
| <i>PANX1</i> (M)                   | AGCATCAAATCAGGCGTCC           | TGTAGACGACCACGGGAATC          |
| <i>PANX2</i> (H)                   | CCCAGAGCCAGGGAAGAG            | GGCGACAAGGAGAAAGTGC           |
| <i>PANX2</i> (M)                   | CATACCCGCCACTTCTCC            | CCCAGCCCACATTCTCTC            |
| <i>PANX3</i> (H)                   | TCATCATCAGCGAACTGG            | CGTTCTTTCCGAGCCTT             |
| <i>PANX3</i> (M)                   | GGAAGTGGTGGTTCGTAGCATA        | CGGAGACCCTGATGAGAA            |
| <i>CX26</i> (M)                    | ATCTGGCTCACGGTCCTCTT          | GGAAGTGGTGGTTCGTAGCATA        |
| <i>CX32</i> (M)                    | GTGGACCTATGTCATCAGT           | GGAAGGCTTCACACTTGACC          |
| <i>CX43</i> (M)                    | GGTGATGAACAGTCTGCCTT          | GTGAGCCAAGTACAGGAGTGT         |
| <i>FAM3A</i> (H)                   | GTGTCACATGGATCGTGGTC          | TGCTCAATCAGCATCTTGTC          |
| <i>FAM3A</i> (M)                   | TCATGAGCAGCGTCAAAGA           | AGGGTACCTTCATGCAGTGG          |
| <i>PEPCK</i> (H)                   | ATGGCCGCATTGTACCGCC           | TCACATTTTGTGCACACGTCTC        |
| <i>PEPCK</i> (M)                   | ATCTTTGGTGGCCGTAGACCT         | CCGAAGTTGTAGCCGAAGAA          |
| <i>G-6-Pase</i> (H)                | GGCATTGCTGTTGCAGAAACT         | AGGTCTACACCCAGTCCCTTGA        |
| <i>G-6-Pase</i> (M)                | AGGAAGGATGGAGGAAGGAA          | TGGAACCAGATGGGAAAGAG          |
| <i>FAS</i> (H)                     | GGAGAACCAGACCCCAGAGT          | CACAGAGGAGAAGACCACAAA         |
| <i>FAS</i> (M)                     | CTGCCACAACCTCTGAGGACA         | CGGATCACCTTCTTGAGAGC          |
| <i>SREBP1</i> (M)                  | ACTTCTGGAGACATCGCAAAC         | GGTAGACAACAGCCGCATC           |
| <i>ACC</i> (M)                     | TGGTCGTGACTGCTCTGTGC          | GTAGCCGAGGGTTTCAGTTCC         |
| <i>SCD1</i> (M)                    | ATGTGCCAGAGGAGCTGAGT          | TGATCCACTGTTGCTTCTGC          |
| <i>PPAR<math>\gamma</math></i> (M) | ACCACTCGCATTCTCTTT            | CACAGACTCGGCACTCA             |
| <i>CHREBP</i> (M)                  | TTACTGGAAGCGGCGCATCG          | CCAAGCAGCACAGGCACCAC          |
| <i>LXR</i> (M)                     | TGCCATCAGCATCTTCTCTG          | GGCTCACCAGCTTCATTAGC          |
| <i>ACO1</i> (M)                    | CCGTCGAGAAATCGAGAACT          | ATTGAGGCCAACAGGTTCCA          |
| <i>CPT1<math>\alpha</math></i> (M) | ACGTTGGACGAATCGGAACA          | GGTGGCCATGACATACTCCC          |
| <i>PPAR<math>\alpha</math></i> (M) | GTGGGTGGTTGAATCGTGAG          | GCAGTGGAGTTTGGGTTGG           |
| <i>SCAD</i> (M)                    | ATGTGCCAGAGGAGCTGAGT          | TGATCCACTGTTGCTTCTGC          |
| <i>MCAD</i> (M)                    | AACTAAACATGGGCCAGCGA          | CAGCTGCGACTGTAGGTCTG          |
| <i>LCAD</i> (M)                    | GCATCAACATCGCAGAGAAA          | ACGCTTGCTCTTCCCAAGTA          |
| <i>Apo B</i> (M)                   | TCACCATTTGCCCTCAACCTA         | GAAGGCTCTTTGGAAGTGTA          |
| <i>MTP</i> (M)                     | ATCATCATTGGAGCCCTGGT          | CATTCTTCAGGGCCAGCA            |



| <b>Gene</b>           | <b>Forward primer (5'-3')</b> | <b>Reverse primer (5'-3')</b> |
|-----------------------|-------------------------------|-------------------------------|
| <i>CD36</i> (M)       | TGGTCAAGCCAGCTAGAAA           | CCCAGTCTCATTTAGCCAC           |
| <i>FATP1</i> (M)      | CCGTATCCTCACGCATGTGT          | CTCCATCGTGTCCCTCATTGAC        |
| <i>FATP2</i> (M)      | GATGCCGTGTCCGTCTTTTAC         | GACTTCAGACCTCCACGACTC         |
| <i>FATP5</i> (M)      | TCGGATCTGGGAATTCTACG          | TTGGTTCTTTCGAACCTTGG          |
| <i>FABP1</i> (M)      | GCCAGGAGAACTTTGAGC            | TTGACGACTGCCTTGACT            |
| <i>FFAR1</i> (M)      | CATCACTCTGCCCCTGAAG           | AAGGCAAAGACTGGGCAGA           |
| <i>MafK</i> (H)       | CTGCGCTCCAAGTACGAGGCG         | TCGGTGGACTTGACGATGGTG         |
| <i>MafK</i> (M)       | GATGAGCTGGTGTCCATGTCAG        | TGTGTCACACGCTTGATGCGAC        |
| <i>β-actin</i> (H, M) | AGCCATGTACGTAGCCATCC          | GCTGTGGTGGTGAAGCTGTA          |

*H* homo sapiens, *M* mus musculus

**Table S4** Mass spectrometry (MS) data of CaM co-immunoprecipitation

| <b>Accession</b> | <b>Description</b>                                                                                             | <b>Sum PEP Score</b> | <b>Coverage (%)</b> | <b># Peptides</b> | <b># Unique peptides</b> | <b># Protein groups</b> | <b># AAs</b> | <b>MW (kD)</b> |
|------------------|----------------------------------------------------------------------------------------------------------------|----------------------|---------------------|-------------------|--------------------------|-------------------------|--------------|----------------|
| Q8BU14           | Translocation protein SEC62<br>OS = Mus musculus<br>OX = 10090<br>GN = Sec62<br>PE = 1<br>SV = 1               | 7.793                | 7                   | 4                 | 4                        | 1                       | 398          | 45.6           |
| P58710           | L-gulonolactone oxidase<br>OS = Mus musculus<br>OX = 10090<br>GN = Gulo<br>PE = 1<br>SV = 3                    | 7.725                | 10                  | 5                 | 5                        | 1                       | 440          | 50.4           |
| Q9EP75           | Leukotriene-B4 omega-hydroxylase 3<br>OS = Mus musculus<br>OX = 10090<br>GN = Cyp4f14<br>PE = 1<br>SV = 1      | 7.669                | 6                   | 3                 | 3                        | 1                       | 524          | 59.8           |
| O35465           | Peptidyl-prolyl cis-trans isomerase FKBP8<br>OS = Mus musculus<br>OX = 10090<br>GN = Fkbp8<br>PE = 1<br>SV = 2 | 7.617                | 8                   | 3                 | 3                        | 1                       | 402          | 43.5           |
| Q9EST1           | Gasdermin-A<br>OS = Mus musculus                                                                               | 7.569                | 5                   | 3                 | 3                        | 1                       | 446          | 49.6           |

| Accession | Description                                                                                                         | Sum PEP Score | Coverage (%) | # Peptides | # Unique peptides | # Protein groups | # AAs | MW (kD) |
|-----------|---------------------------------------------------------------------------------------------------------------------|---------------|--------------|------------|-------------------|------------------|-------|---------|
| P51855    | OX = 10090<br>GN = Gsdma<br>PE = 2 SV = 1<br>Glutathione synthetase<br>OS = Mus musculus                            | 7.568         | 8            | 3          | 3                 | 1                | 474   | 52.2    |
| Q91VS7    | OX = 10090<br>GN = Gss<br>PE = 1<br>SV = 1<br>Microsomal glutathione S-transferase 1<br>OS = Mus musculus           | 7.555         | 19           | 2          | 2                 | 1                | 155   | 17.5    |
| Q80XL6    | OX = 10090<br>GN = Mgst1<br>PE = 1<br>SV = 3<br>Acyl-CoA dehydrogenase family member 11<br>OS = Mus musculus        | 7.524         | 3            | 2          | 2                 | 1                | 779   | 87.3    |
| Q9QXE7    | OX = 10090<br>GN = Acad11<br>PE = 1<br>SV = 2<br>F-box-like/WD repeat-containing protein TBL1X<br>OS = Mus musculus | 7.491         | 8            | 3          | 3                 | 1                | 527   | 56.8    |
| Q9WTU6    | OX = 10090<br>GN = Tbl1x<br>PE = 1<br>SV = 2<br>Mitogen-activated protein kinase 9                                  | 7.48          | 9            | 4          | 4                 | 1                | 423   | 48.2    |

| Accession | Description                                                                                                                     | Sum PEP Score | Coverage (%) | # Peptides | # Unique peptides | # Protein groups | # AAs | MW (kD) |
|-----------|---------------------------------------------------------------------------------------------------------------------------------|---------------|--------------|------------|-------------------|------------------|-------|---------|
|           | OS = Mus musculus<br>OX = 10090<br>GN = Mapk9<br>PE = 1<br>SV = 2                                                               |               |              |            |                   |                  |       |         |
| Q8C2Q3    | RNA-binding protein 14<br>OS = Mus musculus<br>OX = 10090<br>GN = Rbm14<br>PE = 1<br>SV = 1                                     | 7.299         | 6            | 3          | 3                 | 1                | 669   | 69.4    |
| Q7TNC4    | Putative RNA-binding protein Luc7-like 2<br>OS = Mus musculus<br>OX = 10090<br>GN = Luc7l2<br>PE = 1<br>SV = 1                  | 7.279         | 8            | 3          | 3                 | 1                | 392   | 46.6    |
| P61222    | ATP-binding cassette sub-family E member 1<br>OS = Mus musculus<br>OX = 10090<br>GN = Abce1<br>PE = 1<br>SV = 1                 | 7.259         | 7            | 4          | 4                 | 1                | 599   | 67.3    |
| Q9DBJ3    | Brain-specific angiogenesis inhibitor 1-associated protein 2-like protein 1<br>OS = Mus musculus<br>OX = 10090<br>GN = Baiap2l1 | 7.109         | 8            | 4          | 4                 | 1                | 514   | 57.2    |

| Accession | Description                                                                                               | Sum PEP Score | Coverage (%) | # Peptides | # Unique peptides | # Protein groups | # AAs | MW (kD) |
|-----------|-----------------------------------------------------------------------------------------------------------|---------------|--------------|------------|-------------------|------------------|-------|---------|
| P25444    | PE = 1<br>SV = 1<br>40S ribosomal protein S2<br>OS = Mus musculus<br>OX = 10090<br>GN = Rps2              | 7.065         | 14           | 4          | 4                 | 1                | 293   | 31.2    |
| Q8BGS1    | PE = 1<br>SV = 3<br>Band 4.1-like protein 5<br>OS = Mus musculus<br>OX = 10090<br>GN = Epb4115            | 7.015         | 5            | 3          | 3                 | 1                | 731   | 81.6    |
| Q91Y97    | PE = 1 SV = 1<br>Fructose-bisphosphate aldolase B<br>OS = Mus musculus<br>OX = 10090<br>GN = Aldob        | 6.995         | 10           | 3          | 3                 | 1                | 364   | 39.5    |
| Q9QYI3    | PE = 1<br>SV = 3<br>DnaJ homolog subfamily C member 7<br>OS = Mus musculus<br>OX = 10090<br>GN = Dnajc7   | 6.92          | 5            | 2          | 2                 | 1                | 494   | 56.4    |
| Q9JLT4    | PE = 1 SV = 2<br>Thioredoxin reductase 2, mitochondrial<br>OS = Mus musculus<br>OX = 10090<br>GN = Txnrd2 | 6.901         | 5            | 2          | 1                 | 1                | 524   | 56.6    |

| Accession | Description                                                                                                                      | Sum PEP Score | Coverage (%) | # Peptides | # Unique peptides | # Protein groups | # AAs | MW (kD) |
|-----------|----------------------------------------------------------------------------------------------------------------------------------|---------------|--------------|------------|-------------------|------------------|-------|---------|
| Q9D2Y4    | PE = 1<br>SV = 4<br>Mixed lineage kinase domain-like protein<br>OS = Mus musculus<br>OX = 10090<br>GN = Mlkl<br>PE = 1<br>SV = 1 | 6.834         | 6            | 2          | 2                 | 1                | 472   | 54.3    |
| P05202    | Aspartate aminotransferase, mitochondrial<br>OS = Mus musculus<br>OX = 10090<br>GN = Got2<br>PE = 1<br>SV = 1                    | 6.728         | 8            | 3          | 3                 | 1                | 430   | 47.4    |
| P55096    | ATP-binding cassette sub-family D member 3<br>OS = Mus musculus<br>OX = 10090<br>GN = Abcd3<br>PE = 1<br>SV = 2                  | 6.712         | 5            | 3          | 3                 | 1                | 659   | 75.4    |
| Q8R016    | Bleomycin hydrolase<br>OS = Mus musculus<br>OX = 10090<br>GN = Blmh<br>PE = 1<br>SV = 1                                          | 6.684         | 5            | 2          | 2                 | 1                | 455   | 52.5    |
| P70694    | Estradiol 17 beta-dehydrogenase 5<br>OS = Mus musculus                                                                           | 6.67          | 12           | 5          | 5                 | 1                | 323   | 37      |

| Accession | Description                                                                                                                                  | Sum PEP Score | Coverage (%) | # Peptides | # Unique peptides | # Protein groups | # AAs | MW (kD) |
|-----------|----------------------------------------------------------------------------------------------------------------------------------------------|---------------|--------------|------------|-------------------|------------------|-------|---------|
|           | OX = 10090<br>GN = Akr1c6<br>PE = 1<br>SV = 1                                                                                                |               |              |            |                   |                  |       |         |
| Q61048    | WW domain-binding protein 4<br>OS = Mus musculus<br>OX = 10090<br>GN = Wbp4<br>PE = 1 SV = 4                                                 | 6.667         | 7            | 2          | 2                 | 1                | 376   | 42.1    |
| P70441    | Na <sup>+</sup> /H <sup>+</sup> exchange regulatory cofactor NHE-RF1<br>OS = Mus musculus<br>OX = 10090<br>GN = Slc9a3r1<br>PE = 1<br>SV = 3 | 6.623         | 12           | 4          | 4                 | 1                | 355   | 38.6    |

**Table S5** Mass spectrometry (MS) data of DNA pull-down

| <b>Accession</b> | <b>Description</b>                                                                                                      | <b>Sum PEP score</b> | <b>Coverage (%)</b> | <b># Peptides</b> | <b># Unique peptides</b> | <b># Protein groups</b> | <b># AAs</b> | <b>MW (kD)</b> |
|------------------|-------------------------------------------------------------------------------------------------------------------------|----------------------|---------------------|-------------------|--------------------------|-------------------------|--------------|----------------|
| P22361           | Hepatocyte nuclear factor 1-alpha<br>OS = Mus musculus<br>OX = 10090<br>GN = Hnf1a<br>PE = 1<br>SV = 2                  | 18.655               | 10                  | 5                 | 5                        | 1                       | 628          | 67.2           |
| Q9WU00           | Nuclear respiratory factor 1<br>OS = Mus musculus<br>OX = 10090<br>GN = Nrf1<br>PE = 1<br>SV = 2                        | 5.556                | 4                   | 2                 | 2                        | 1                       | 503          | 53.5           |
| P42225           | Signal transducer and activator of transcription 1<br>OS = Mus musculus<br>OX = 10090<br>GN = Stat1<br>PE = 1<br>SV = 1 | 4.151                | 2                   | 1                 | 1                        | 1                       | 749          | 87.1           |
| Q9R1E0           | Forkhead box protein O1<br>OS = Mus musculus<br>OX = 10090<br>GN = FoxO1<br>PE = 1                                      | 1.687                | 2                   | 1                 | 1                        | 1                       | 652          | 69.5           |



| Accession | Description                                                                                   | Sum PEP score | Coverage (%) | # Peptides | # Unique peptides | # Protein groups | # AAs | MW (kD) |
|-----------|-----------------------------------------------------------------------------------------------|---------------|--------------|------------|-------------------|------------------|-------|---------|
|           | SV = 2                                                                                        |               |              |            |                   |                  |       |         |
| Q08639    | Transcription factor Dp-1<br>OS = Mus musculus<br>OX = 10090<br>GN = Tfdp1<br>PE = 1 SV = 1   | 1.001         | 3            | 1          | 1                 | 1                | 410   | 45.2    |
| Q64152    | Transcription factor Btf3<br>OS = Mus musculus<br>OX = 10090<br>GN = Btf3<br>PE = 1<br>SV = 3 | 4.514         | 9            | 1          | 1                 | 1                | 204   | 22      |
| Q61827    | Transcription factor MafK<br>OS = Mus musculus<br>OX = 10090<br>GN = Mafk<br>PE = 1<br>SV=1   | 1.647         | 7            | 1          | 1                 | 1                | 156   | 17.5    |
